# Supplementary material for: Molecular and Serological Detection of Bovine Coronaviruses in Marmots (Marmota marmota) in the Alpine Region
Source: MDPI journal article supplement (doi:10.3390/v16040591), 2024-04-11
Supplement: s1 [file s1]

| ID  | Capture date | Capture area  |      | Release date | Release area        |      | Sex | Age                          | Body weight | Body length | Samples |      | Pan-CoV RT-PCR |
|-----|--------------|---------------|------|--------------|---------------------|------|-----|------------------------------|-------------|-------------|---------|------|----------------|
|     |              | Area          | Prov |              | Area                | Prov |     | Adult (Ad)<br>Juvenile (Juv) | Kg          | Cm          | Faeces  | Sera |                |
| 159 | 08/05/2022   | Viera         | So   | 12/05/2022   | Tombea, Magasa      | Bs   | M   | Ad                           | 3.25        | 48.0        | Y       | N    | NEG            |
| 160 | 08/05/2022   | Viera         | So   | 12/05/2022   | Tombea, Magasa      | Bs   | M   | Ad                           | 3.63        | 45.0        | Y       | N    | NEG            |
| 161 | 08/05/2022   | Viera         | So   | 12/05/2022   | Tombea, Magasa      | Bs   | M   | Juv                          | 2.42        | 41.0        | Y       | N    | NEG            |
| 162 | 08/05/2022   | Viera         | So   | 12/05/2022   | Tombea, Magasa      | Bs   | F   | Ad                           | 2.58        | 39.0        | Y       | N    | NEG            |
| 163 | 08/05/2022   | Viera         | So   | 12/05/2022   | Tombea, Magasa      | Bs   | F   | Ad                           | 3.57        | 45.5        | Y       | N    | NEG            |
| 165 | 07/05/2022   | Federia       | So   | 12/05/2022   | Tremalzo, Tremosine | Bs   | M   | Juv                          | 1.55        | 36.5        | Y       | N    | NEG            |
| 166 | 07/05/2022   | Federia       | So   | 12/05/2022   | Tremalzo, Tremosine | Bs   | F   | Ad                           | 3.02        | 44.0        | Y       | Y    | NEG            |
| 167 | 09/05/2022   | Viera         | So   | 12/05/2022   | Tombea, Magasa      | Bs   | F   | Ad                           | 3.90        | 49.0        | Y       | Y    | NEG            |
| 168 | 09/05/2022   | Viera         | So   | 12/05/2022   | Tombea, Magasa      | Bs   | M   | Ad                           | 3.75        | 48.0        | Y       | Y    | NEG            |
| 169 | 09/05/2022   | Viera         | So   | 12/05/2022   | Tombea, Magasa      | Bs   | F   | Juv                          | 2.11        | 40.5        | N       | Y    | NEG            |
| 170 | 09/05/2022   | Viera         | So   | 12/05/2022   | Tombea, Magasa      | Bs   | F   | Ad                           | 3.48        | 48.3        | Y       | Y    | NEG            |
| 171 | 09/05/2022   | Viera         | So   | 12/05/2022   | Tombea, Magasa      | Bs   | M   | Ad                           | 3.61        | 49.5        | Y       | Y    | NEG            |
| 172 | 09/05/2022   | Viera         | So   | 12/05/2022   | Tombea, Magasa      | Bs   | F   | Ad                           | 4.04        | 49.5        | N       | Y    | NEG            |
| 174 | 09/05/2022   | Viera         | So   | 12/05/2022   | Tombea, Magasa      | Bs   | F   | Ad                           | 3.49        | 48.5        | Y       | Y    | NEG            |
| 175 | 09/05/2022   | Viera         | So   | 12/05/2022   | Tombea, Magasa      | Bs   | M   | Ad                           | 3.52        | 51.0        | Y       | N    | NEG            |
| 176 | 09/05/2022   | Viera         | So   | 12/05/2022   | Tombea, Magasa      | Bs   | F   | Ad                           | 3.30        | 44.5        | Y       | Y    | NEG            |
| 177 | 10/05/2022   | Viera         | So   | 12/05/2022   | Tombea, Magasa      | Bs   | M   | Ad                           | 4.21        | 48.2        | Y       | N    | NEG            |
| 181 | 10/05/2022   | Viera         | So   | 12/05/2022   | Tombea, Magasa      | Bs   | F   | Ad                           | 3.51        | 43.0        | Y       | Y    | NEG            |
| 182 | 10/05/2022   | Viera         | So   | 12/05/2022   | Tombea, Magasa      | Bs   | M   | Juv                          | 1.60        | 37.0        | N       | Y    | NEG            |
| 183 | 10/05/2022   | Federia_alta  | So   | 12/05/2022   | Tremalzo, Tremosine | Bs   | M   | Juv                          | 2.49        | 38.5        | N       | Y    | NEG            |
| 184 | 10/05/2022   | Federia_alta  | So   | 12/05/2022   | Tremalzo, Tremosine | Bs   | M   | Juv                          | 2.48        | 40.5        | N       | Y    | NEG            |
| 185 | 10/05/2022   | Federia_alta  | So   | 12/05/2022   | Tremalzo, Tremosine | Bs   | F   | Ad                           | 4.27        | 46.0        | N       | Y    | NEG            |
| 186 | 10/05/2022   | Federia_alta  | So   | 12/05/2022   | Tremalzo, Tremosine | Bs   | M   | Ad                           | 4.21        | 48.5        | N       | Y    | NEG            |
| 205 | 13/05/2022   | Federia_media | So   | 18/05/2022   | Aviolo              | Bs   | M   | Ad                           | 3.94        | 50.0        | Y       | N    | NEG            |
| 206 | 13/05/2022   | Federia_media | So   | 16/05/2022   | Tombea, Magasa      | Bs   | M   | Ad                           | 2.90        | 43.5        | Y       | N    | NEG            |
| 207 | 13/05/2022   | Federia_media | So   | 16/05/2022   | Tombea, Magasa      | Bs   | M   | Ad                           | 3.43        | 45.0        | Y       | N    | NEG            |
| 208 | 13/05/2022   | Federia_media | So   | 16/05/2022   | Tombea, Magasa      | Bs   | M   | Ad                           | 3.71        | 47.5        | Y       | N    | NEG            |
| 209 | 13/05/2022   | Federia_media | So   | 16/05/2022   | Tombea, Magasa      | Bs   | M   | Juv                          | 2.01        | 41.5        | Y       | N    | NEG            |
| 210 | 13/05/2022   | Federia_media | So   | 16/05/2022   | Tombea, Magasa      | Bs   | M   | Ad                           | 3.57        | 49.5        | Y       | N    | NEG            |
| 211 | 13/05/2022   | Federia_media | So   | 16/05/2022   | Tombea, Magasa      | Bs   | M   | Ad                           | 3.97        | 47.0        | Y       | N    | NEG            |
| 212 | 13/05/2022   | Federia_media | So   | 18/05/2022   | Aviolo              | Bs   | M   | Ad                           | 3.34        | 46.5        | Y       | N    | NEG            |
| 213 | 13/05/2022   | Federia_media | So   | 16/05/2022   | Tombea, Magasa      | Bs   | M   | Ad                           | 3.62        | 49.5        | N       | Y    | NEG            |
| 214 | 13/05/2022   | Federia_media | So   | 16/05/2022   | Tombea, Magasa      | Bs   | M   | Ad                           | 3.18        | 45.0        | N       | Y    | NEG            |
| 215 | 13/05/2022   | Federia_media | So   | 16/05/2022   | Tombea, Magasa      | Bs   | M   | Ad                           | 3.58        | 48.0        | N       | Y    | NEG            |
| 216 | 13/05/2022   | Federia_media | So   | 16/05/2022   | Tombea, Magasa      | Bs   | M   | Ad                           | 3.93        | 50.5        | Y       | Y    | NEG            |
| 217 | 13/05/2022   | Federia_media | So   | 16/05/2022   | Tombea, Magasa      | Bs   | M   | Ad                           | 4.12        | 49.0        | Y       | Y    | NEG            |
| 218 | 13/05/2022   | Federia_media | So   | 18/05/2022   | Aviolo              | Bs   | M   | Ad                           | 3.87        | 49.5        | Y       | Y    | NEG            |
| 219 | 14/05/2022   | Federia_media | So   | 16/05/2022   | Tombea, Magasa      | Bs   | M   | Ad                           | 2.95        | 47.0        | N       | Y    | NEG            |
| 220 | 14/05/2022   | Vallaccia     | So   | 18/05/2022   | Aviolo              | Bs   | M   | Ad                           | 3.51        | 49.0        | Y       | Y    | NEG            |
| 221 | 14/05/2022   | Vallaccia     | So   | 18/05/2022   | Aviolo              | Bs   | M   | Juv                          | 1.90        | 48.5        | N       | Y    | NEG            |
| 222 | 14/05/2022   | Vallaccia     | So   | 18/05/2022   | Aviolo              | Bs   | M   | Juv                          | 1.75        | 47.0        | N       | Y    | NEG            |

|     |            |                     |               |                |    |   |     |      |      |   |   |     |
|-----|------------|---------------------|---------------|----------------|----|---|-----|------|------|---|---|-----|
| 223 | 15/05/2022 | Vallaccia           | So 18/05/2022 | Aviolo         | Bs | M | Ad  | 3.23 | 48.0 | Y | N | NEG |
| 224 | 15/05/2022 | Vallaccia           | So 18/05/2022 | Aviolo         | Bs | M | Ad  | 3.74 | 51.5 | Y | N | NEG |
| 226 | 16/05/2022 | Vallaccia           | So 18/05/2022 | Aviolo         | Bs | M | Ad  | 3.89 | 51.0 | Y | N | NEG |
| 228 | 16/05/2022 | Federia_bassa       | So 18/05/2022 | Aviolo         | Bs | M | Ad  | 3.59 | 50.0 | Y | N | NEG |
| 230 | 16/05/2022 | Federia_bassa       | So 18/05/2022 | Aviolo         | Bs | M | Ad  | 3.94 | 50.0 | Y | N | NEG |
| 231 | 16/05/2022 | Federia_bassa       | So 18/05/2022 | Aviolo         | Bs | M | Ad  | 3.89 | 50.0 | Y | N | NEG |
| 234 | 16/05/2022 | Federia_bassa       | So 18/05/2022 | Aviolo         | Bs | M | Ad  | 3.92 | 50.0 | Y | N | NEG |
| 236 | 16/05/2022 | Vallaccia           | So 18/05/2022 | Aviolo         | Bs | M | Ad  | 3.80 | 49.0 | Y | N | NEG |
| 238 | 17/05/2022 | Vallaccia           | So 18/05/2022 | Aviolo         | Bs | M | Juv | 2.24 | 40.0 | Y | N | NEG |
| 241 | 18/05/2022 | Calcheira_Superiore | So 22/05/2022 | Aviolo         | Bs | M | Ad  | 3.98 | 51.0 | Y | N | NEG |
| 242 | 18/05/2022 | Bork                | So 22/05/2022 | Aviolo         | Bs | M | Ad  | 4.13 | 50.0 | Y | N | NEG |
| 243 | 19/05/2022 | Bork                | So 22/05/2022 | Aviolo         | Bs | M | Ad  | 2.83 | 42.0 | Y | N | NEG |
| 244 | 19/05/2022 | Bork                | So 22/05/2022 | Aviolo         | Bs | M | Ad  | 3.93 | 49.0 | Y | N | NEG |
| 246 | 19/05/2022 | Bork                | So 22/05/2022 | Aviolo         | Bs | M | Ad  | 4.44 | 50.0 | Y | N | POS |
| 249 | 20/05/2022 | Bork                | So 22/05/2022 | Aviolo         | Bs | M | Ad  | 2.68 | 44.5 | Y | N | POS |
| 250 | 20/05/2022 | Bork                | So 22/05/2022 | Aviolo         | Bs | M | Ad  | 3.81 | 49.5 | Y | N | POS |
| 251 | 20/05/2022 | Bork                | So 22/05/2022 | Aviolo         | Bs | M | Ad  | 2.9  | 43.5 | Y | N | POS |
| 252 | 21/05/2022 | Beltram             | So 22/05/2022 | Aviolo         | Bs | M | Ad  | 4.62 | 49.5 | Y | N | NEG |
| 253 | 21/05/2022 | Bork                | So 22/05/2022 | Aviolo         | Bs | M | Ad  | 4.1  | 51.5 | Y | N | NEG |
| 255 | 21/05/2022 | Bork                | So 22/05/2022 | Aviolo         | Bs | M | Juv | 2.3  | 43.5 | Y | N | NEG |
| 302 | 12/05/2022 | Federia_alta        | So 16/05/2022 | Tombea, Magasa | Bs | F | Ad  | 2.77 | 44.0 | Y | N | NEG |
| 303 | 12/05/2022 | Federia_media       | So 16/05/2022 | Tombea, Magasa | Bs | F | Ad  | 3.29 | 46.0 | Y | Y | NEG |
| 305 | 12/05/2022 | Federia_media       | So 18/05/2022 | Aviolo         | Bs | F | Ad  | 3.07 | 41.0 | Y | N | NEG |
| 306 | 13/05/2022 | Federia_media       | So 16/05/2022 | Tombea, Magasa | Bs | F | Ad  | 3.37 | 46.5 | N | Y | NEG |
| 307 | 13/05/2022 | Federia_media       | So 16/05/2022 | Tombea, Magasa | Bs | F | Ad  | 3.78 | 48.5 | Y | Y | NEG |
| 308 | 13/05/2022 | Federia_media       | So 16/05/2022 | Tombea, Magasa | Bs | F | Juv | 1.78 | 38.5 | N | Y | NEG |
| 309 | 14/05/2022 | Federia_media       | So 16/05/2022 | Tombea, Magasa | Bs | F | Ad  | 2.74 | 48.5 | N | Y | NEG |
| 310 | 14/05/2022 | Federia_media       | So 18/05/2022 | Aviolo         | Bs | F | Ad  | 2.97 | 49.0 | Y | Y | NEG |
| 311 | 14/05/2022 | Federia_media       | So 18/05/2022 | Aviolo         | Bs | F | Ad  | 3.35 | 49.0 | N | Y | NEG |
| 312 | 14/05/2022 | Federia_bassa       | So 18/05/2022 | Aviolo         | Bs | F | Ad  | 3.31 | 47.0 | Y | Y | NEG |
| 313 | 14/05/2022 | Vallaccia           | So 18/05/2022 | Aviolo         | Bs | F | Ad  | 3.21 | 47.0 | N | Y | NEG |
| 314 | 15/05/2022 | Federia_bassa       | So 18/05/2022 | Aviolo         | Bs | F | Ad  | 3.53 | 47.5 | Y | N | NEG |
| 315 | 15/05/2022 | Federia_bassa       | So 18/05/2022 | Aviolo         | Bs | F | Ad  | 3.29 | 48.5 | N | Y | NEG |
| 316 | 15/05/2022 | Vallaccia           | So 18/05/2022 | Aviolo         | Bs | F | Ad  | 3.33 | 50.0 | Y | N | NEG |
| 317 | 16/05/2022 | Vallaccia           | So 18/05/2022 | Aviolo         | Bs | F | Ad  | 3.45 | 46.0 | Y | N | NEG |
| 318 | 16/05/2022 | Federia_bassa       | So 18/05/2022 | Aviolo         | Bs | F | Ad  | 3.44 | 48.5 | Y | N | NEG |
| 320 | 16/05/2022 | Vallaccia           | So 18/05/2022 | Aviolo         | Bs | F | Ad  | 3.25 | 44.0 | Y | N | NEG |
| 322 | 16/05/2022 | Campaccia           | So 18/05/2022 | Aviolo         | Bs | F | Juv | 1.76 | 46.5 | Y | N | NEG |
| 323 | 17/05/2022 | Vallaccia           | So 18/05/2022 | Aviolo         | Bs | F | Ad  | 3.52 | 42.5 | Y | N | NEG |
| 327 | 18/05/2022 | Calcheira_Superiore | So 22/05/2022 | Aviolo         | Bs | F | Ad  | 3.87 | 48.0 | Y | N | NEG |
| 332 | 19/05/2022 | Bork                | So 22/05/2022 | Aviolo         | Bs | F | Ad  | 3.43 | 45.0 | Y | N | POS |
| 334 | 20/05/2022 | Bork                | So 22/05/2022 | Aviolo         | Bs | F | Juv | 2.47 | 42.0 | Y | N | NEG |
| 335 | 20/05/2022 | Bork                | So 22/05/2022 | Aviolo         | Bs | F | Juv | 2.28 | 41.0 | Y | N | NEG |
| 336 | 20/05/2022 | Bork                | So 22/05/2022 | Aviolo         | Bs | F | Juv | 2.39 | 40.5 | Y | N | POS |
| 339 | 20/05/2022 | Bork                | So 22/05/2022 | Aviolo         | Bs | F | Ad  | 4.18 | 50.5 | Y | N | POS |
| 340 | 20/05/2022 | Bork                | So 22/05/2022 | Aviolo         | Bs | F | Ad  | 3.85 | 46.5 | Y | N | POS |

|     |            |      |    |            |        |    |   |     |      |      |   |   |     |
|-----|------------|------|----|------------|--------|----|---|-----|------|------|---|---|-----|
| 341 | 20/05/2022 | Bork | So | 22/05/2022 | Aviolo | Bs | F | Ad  | 3.5  | 46.5 | Y | N | POS |
| 342 | 21/05/2022 | Bork | So | 22/05/2022 | Aviolo | Bs | F | Juv | 2.38 | 41.5 | Y | N |     |

ID: Identificative number

Prov: Province; So: Sondrio; Bs: Brescia

M: male; F: female

Y:yes; N: not

Table S1. Areas and dates of capture and release of marmots and the sex, age, body measurements, and samples collected from each animal (Y = yes; N = not collected).

S protein

protein

Signal peptide

102030405060708090100110120

↓↓↓↓↓

|                                                                                            |              |         |       |            |             |             |             |           |            |            |            |            |            |   |   |   |   |   |   |   |   |   |
|--------------------------------------------------------------------------------------------|--------------|---------|-------|------------|-------------|-------------|-------------|-----------|------------|------------|------------|------------|------------|---|---|---|---|---|---|---|---|---|
| #U00735.2Bovine_coronavirus_strain_Mebus_complete_genome                                   | MFLILLISLSLP | MAFAVIV | LDLK  | CTTVSINDVD | TGAPSISDTDI | VDVVTNGLGYT | YVLDRVYLTNT | TLLNGYYPT | SGSTYRNMAL | KGITLLSRWL | FKFPFLSDFI | NGIFAKVKNT | KVKKGVGMYS | [ | T | ] | [ | T | ] | [ | T | ] |
| #NC_003045.1Bovine_coronavirus_isolate_BCoV-ENT7Sprotein_USA                               |              | T       | FAVIV | LDLK       |             | V           | T           |           |            | T          |            | D          |            | [ | T | ] | [ | D | ] | [ | D | ] |
| #EF242615.1Bovine_coronavirus_E-AH65_complete_genome                                       |              |         | L     |            | V           | T           |             |           |            | T          |            |            |            | [ | T | ] | [ |   | ] | [ |   | ] |
| #AF220295.1Bovine_coronavirus_strain_Quebec_complete_genome                                |              |         |       |            |             |             |             |           |            |            |            |            |            | [ | T | ] | [ |   | ] | [ |   | ] |
| #K318118.1_Bovine_coronavirus_isolate_BCoV/FRA/EP1/Caen/2013/08_spike_glycoprotein         |              | T       |       |            | V           | T           |             |           |            | T          |            | N          |            | [ | T | ] | [ | N | ] | [ | N | ] |
| #EU014640.1_Bovine_coronavirus_strain_438/05-NH-50_S_protein_(S)_gene_complete_cds         |              |         |       | SR         |             | T           | A           |           |            |            |            |            |            | [ | T | ] | [ | A | ] | [ |   | ] |
| #KFL69910.1_Bovine_coronavirus_isolate_SWE/02-2_spike_glycoprotein_(S)_gene_complete_cds   |              |         |       |            | V           | F           | T           |           |            |            |            | T          | D          | [ | T | ] | [ | T | ] | [ | D | ] |
| #KFL69913.1_Bovine_coronavirus_isolate_DEN/03-1_spike_glycoprotein_(S)_gene_complete_cds   |              | T       |       |            |             |             |             |           |            | T          |            |            | T          | [ | T | ] | [ |   | ] | [ | T | ] |
| #KFL69934.1_Bovine_coronavirus_isolate_SWE/P/09-1_spike_glycoprotein_(S)_gene_complete_cds |              | TT      |       |            | V           | F           | T           |           |            |            |            | N          |            | [ | T | ] | [ | N | ] | [ | N | ] |
| #EU019216_Bovine_coronavirus_Bubalus/Italy/179/07-11gene_spike_protein_(S)_4.9_kds         |              |         |       |            |             |             |             |           |            | T          |            |            |            | [ | T | ] | [ |   | ] | [ |   | ] |
| #DQ389632.1_Bovine_coronavirus_isolate_KCD1_spike_glycoprotein_precursor_(S)_KOR           |              |         |       |            | V           | T           |             |           |            | T          |            | D          |            | [ | T | ] | [ | D | ] | [ | D | ] |
| #DQ389658.1_Bovine_coronavirus_isolate_KWD17_spike_glycoprotein_precursor_(S)_KOR          |              |         |       |            | V           | T           |             |           |            | T          |            |            |            | [ | T | ] | [ |   | ] | [ |   | ] |
| #KFL69932.1_Bovine_coronavirus_isolate_SWE/C/08-2_spike_glycoprotein_(S)_gene_complete_cds |              | TT      |       | N          | V           | L           | T           |           |            | T          |            | N          |            | [ | T | ] | [ | N | ] | [ | N | ] |
| #KFL69916.1_Bovine_coronavirus_isolate_DEN/05-1_spike_glycoprotein_(S)_gene_complete_cds   |              |         |       |            | V           |             |             |           |            |            | H          | T          | T          | [ | T | ] | [ | T | ] | [ | D | ] |
| #KFL69918.1_Bovine_coronavirus_isolate_DEN/05-3_spike_glycoprotein_(S)_gene_complete_cds   |              |         |       |            | V           | T           |             |           |            | T          |            |            |            | [ | T | ] | [ |   | ] | [ |   | ] |
| #F193075.1_Bovine_coronavirus_strain_V270_1983_GER_spike_protein_gene                      |              |         |       |            |             |             |             |           |            |            | H          | T          | T          | [ | T | ] | [ | T | ] | [ | D | ] |
| #DQ389637.1_Bovine_coronavirus_isolate_KCD6_spike_glycoprotein_precursor_(S)_gene-KOR      |              | N       |       |            | V           | T           |             |           |            | T          |            | G          |            | [ | T | ] | [ | G | ] | [ |   | ] |
| #KFL69918.1_Bovine_coronavirus_isolate_SWE/C/92_spike_glycoprotein_(S)_gene_complete_cds   |              | T       |       |            | V           | T           |             |           |            | T          |            | T          | D          | [ | T | ] | [ | T | ] | [ | D | ] |
| #D00731.1_Bovine_enteric_coronavirus_F15_1979_FRA_gene_for_spike_glycoprotein              |              | L       |       |            | V           | T           |             |           |            | T          |            | H          |            | [ | T | ] | [ | H | ] | [ |   | ] |
| #ON792942_Bovine_coronavirus_strain_ABGE0-54_S_gene_Ireland                                |              |         |       |            | V           | T           |             |           |            | T          |            | N          |            | [ | T | ] | [ | N | ] | [ | N | ] |
| #FJ938065.1Bovine_respiratory_coronavirus_AH187_complete_genome                            |              | T       |       | L          | V           | T           |             |           |            | T          |            | D          |            | [ | T | ] | [ | D | ] | [ | D | ] |
| #MG757144.1_Bovine_coronavirus_isolate_strain_ICSA17-LBA_spike_protein_(S)                 |              | T       |       |            | V           | T           |             |           |            | T          |            | N          |            | [ | T | ] | [ | N | ] | [ | N | ] |
| #MG757140_Bovine coronavirus isolate ICSA16-LBA 2014 France                                |              | T       |       |            | V           | T           |             |           |            | T          |            | N          |            | [ | T | ] | [ | N | ] | [ | N | ] |
| #X2127-Marmot/Italy/193728-34/2023/CoV                                                     |              |         |       |            | V           | T           |             |           |            |            | T          |            |            | [ | T | ] | [ |   | ] | [ |   | ] |
| #X2128-Marmot/Italy/193728-35/2023/CoV                                                     |              |         |       |            | V           | T           |             |           |            |            | T          | S          | N          | [ | T | ] | [ | S | ] | [ | N | ] |

|                                                                                            | 130        | 140        | 150        | 160        | 170        | 180        | 190         | 200        | 210        | 220        | 230         | 240        |
|--------------------------------------------------------------------------------------------|------------|------------|------------|------------|------------|------------|-------------|------------|------------|------------|-------------|------------|
| U00735.2Bovine_coronavirus_strain_Mebius_complete_genome                                   | EFPAITGTST | FVNTSYSVVV | QPHTTNDLNK | LQGLLEISVC | QYTMCEYPHT | ICHPNLGNKR | VELVHHWDTVG | VSCLYKRNFT | YDVNADLYLV | HFYQGGGTGY | AYFTDTGVVTF | KFLFNVLVLT |
| #NC_003045_Bovine_coronavirus_isolate_BCoV-ENTSProtein_USA                                 | .....I.G.  | .....F.    | .....F.    | .....N.    | .....N.    | .....Q.    | .....Q.     | .....N.    | .....Q.    | .....Q.    | .....Q.     | .....Q.    |
| #EF424615.1Bovine_coronavirus_E-AH65_complete_genome                                       | .....I.G.  | .....F.    | .....F.    | .....N.    | .....N.    | .....Q.    | .....Q.     | .....N.    | .....Q.    | .....Q.    | .....Q.     | .....Q.    |
| #AF220295.1Bovine_coronavirus_strain_Quebec_complete_genome                                | .....I.G.  | .....F.    | .....F.    | .....N.    | .....N.    | .....Q.    | .....Q.     | .....N.    | .....Q.    | .....Q.    | .....Q.     | .....Q.    |
| #KT318118.1_Bovine_coronavirus_isolate_BCoV/FRA/EPI/Caen/2013/08_spike_glycoprotein        | .....Y.    | .....F.    | .....I.    | .....V.    | .....N.    | .....N.    | .....Q.     | .....N.    | .....Q.    | .....Q.    | .....Q.     | .....Q.    |
| #EU814648.1_Bovine_coronavirus_strain_438/06-TN-50_S_protein_(S)_gene_complete_cds         | .....I.G.  | .....F.    | .....F.    | .....N.    | .....N.    | .....Q.    | .....Q.     | .....N.    | .....Q.    | .....Q.    | .....Q.     | .....Q.    |
| #KFL69910.1_Bovine_coronavirus_isolate_SWE/02-2_spike_glycoprotein_(S)_gene_complete_cds   | .....I.G.  | .....F.    | .....F.    | .....N.    | .....N.    | .....Q.    | .....Q.     | .....N.    | .....Q.    | .....Q.    | .....Q.     | .....Q.    |
| #KFL69913.1_Bovine_coronavirus_isolate_DEN/05-1_spike_glycoprotein_(S)_gene_complete_cds   | .....I.G.  | .....F.    | .....F.    | .....N.    | .....N.    | .....Q.    | .....Q.     | .....N.    | .....Q.    | .....Q.    | .....Q.     | .....Q.    |
| #KFL69914.1_Bovine_coronavirus_isolate_DEN/05-1_spike_glycoprotein_(S)_gene_complete_cds   | .....I.G.  | .....F.    | .....F.    | .....N.    | .....N.    | .....Q.    | .....Q.     | .....N.    | .....Q.    | .....Q.    | .....Q.     | .....Q.    |
| #EU019216_Bovine_coronavirus_Bubalus/Italy/179/07-11gene_spike_protein_(S)_4.9_kds         | .....Y.    | .....F.    | .....I.    | .....V.    | .....N.    | .....N.    | .....Q.     | .....N.    | .....Q.    | .....Q.    | .....Q.     | .....Q.    |
| #DQ389632.1_Bovine_coronavirus_isolate_KCD1_spike_glycoprotein_precursor_(S)_KOR           | .....F.    | .....F.S.  | .....F.    | .....N.    | .....N.    | .....Q.    | .....Q.     | .....N.    | .....Q.    | .....Q.    | .....Q.     | .....Q.    |
| #DQ389658.1_Bovine_coronavirus_isolate_KWD17_spike_glycoprotein_precursor_(S)_KOR          | .....F.    | .....F.S.  | .....F.    | .....N.    | .....N.    | .....Q.    | .....Q.     | .....N.    | .....Q.    | .....Q.    | .....Q.     | .....Q.    |
| #KFL69932.1_Bovine_coronavirus_isolate_SWE/C/08-2_spike_glycoprotein_(S)_gene_complete_cds | .....I.G.  | .....F.    | .....F.    | .....N.    | .....N.    | .....Q.    | .....Q.     | .....N.    | .....Q.    | .....Q.    | .....Q.     | .....Q.    |
| #KFL69916.1_Bovine_coronavirus_isolate_DEN/05-1_spike_glycoprotein_(S)_gene_complete_cds   | .....T.    | .....F.    | .....F.    | .....N.    | .....N.    | .....Q.    | .....Q.     | .....N.    | .....Q.    | .....Q.    | .....Q.     | .....Q.    |
| #KFL69918.1_Bovine_coronavirus_isolate_DEN/05-3_spike_glycoprotein_(S)_gene_complete_cds   | .....T.    | .....F.    | .....F.    | .....N.    | .....N.    | .....Q.    | .....Q.     | .....N.    | .....Q.    | .....Q.    | .....Q.     | .....Q.    |
| #EF193075.1_Bovine_coronavirus_strain_V270_1983_GER_spike_protein_gene                     | .....I.G.  | .....F.    | .....F.    | .....N.    | .....N.    | .....Q.    | .....Q.     | .....N.    | .....Q.    | .....Q.    | .....Q.     | .....Q.    |
| #DQ389637.1_Bovine_coronavirus_isolate_KCD6_spike_glycoprotein_precursor_(S)_gene-KOR      | .....F.    | .....F.S.  | .....F.    | .....N.    | .....N.    | .....Q.    | .....Q.     | .....N.    | .....Q.    | .....Q.    | .....Q.     | .....Q.    |
| #KFL69908.1_Bovine_coronavirus_isolate_SWE/C/92_spike_glycoprotein_(S)_gene_complete_cds   | .....L.    | .....F.    | .....F.    | .....N.    | .....N.    | .....Q.    | .....Q.     | .....N.    | .....Q.    | .....Q.    | .....Q.     | .....Q.    |
| #DQ00731.1_Bovine_enteric_coronavirus_T5_1979_FRA_gene_for_spike_glycoprotein              | .....I.G.  | .....F.    | .....F.    | .....N.    | .....N.    | .....Q.    | .....Q.     | .....N.    | .....Q.    | .....Q.    | .....Q.     | .....Q.    |
| #QV192942_Bovine_coronavirus_strain_ABCEB0-54_S_gene_Ire                                   | .....I.G.  | .....F.    | .....F.    | .....N.    | .....N.    | .....Q.    | .....Q.     | .....N.    | .....Q.    | .....Q.    | .....Q.     | .....Q.    |
| #FJ938065.1Bovine_respiratory_coronavirus_AH187_complete_genome                            | .....F.    | .....F.    | .....F.    | .....N.    | .....N.    | .....Q.    | .....Q.     | .....N.    | .....Q.    | .....Q.    | .....Q.     | .....Q.    |
| #MG757144.1_Bovine_coronavirus_isolate_ICSA17-LBA_spike_protein_(S)                        | .....F.    | .....F.    | .....F.    | .....N.    | .....N.    | .....Q.    | .....Q.     | .....N.    | .....Q.    | .....Q.    | .....Q.     | .....Q.    |
| #MG757140_Bovine_coronavirus_isolate_ICSA16-LBA_2014_France                                | .....F.    | .....F.    | .....F.    | .....N.    | .....N.    | .....Q.    | .....Q.     | .....N.    | .....Q.    | .....Q.    | .....Q.     | .....Q.    |
| #X2127-Marmot/Italy/193728-34/2023/CoV                                                     | .....I.    | .....F.    | .....I.    | .....V.    | .....N.    | .....N.    | .....Q.     | .....N.    | .....Q.    | .....Q.    | .....Q.     | .....Q.    |
| #X2128-Marmot/Italy/193728-35/2023/CoV                                                     | .....I.    | .....F.    | .....I.    | .....V.    | .....N.    | .....N.    | .....Q.     | .....N.    | .....Q.    | .....Q.    | .....Q.     | .....Q.    |

**Immuno-reactive domain SA1**

[illegible]



|                                        |             |        |
|----------------------------------------|-------------|--------|
| #X2127-Marmot/Italy/193728-34/2023/CoV | .....G..... | [ 720] |
| #X2128-Marmot/Italy/193728-35/2023/CoV | .....G..... | [ 720] |

Proteolytic  
cleavage region

|                                                                                            |             |                 |             |             |             |             |             |             |             |             |             |            |        |
|--------------------------------------------------------------------------------------------|-------------|-----------------|-------------|-------------|-------------|-------------|-------------|-------------|-------------|-------------|-------------|------------|--------|
|                                                                                            | 730         | 740             | 750         | 760         | 770         | 780         | 790         | 800         | 810         | 820         | 830         |            |        |
| #U00735.2Bovine_coronavirus_strain_Mebus_complete_genome                                   | QLQPINYPDS  | YLGCVVNADN      | STSSVVQPCD  | LTVGSQCYVD  | YSTKRRSRFA  | ITTGYRFTTF  | EFPTVNSVND  | SLEPVGGLYE  | IQIPSEFTIG  | NMEEFIQTSS  | PKVTIDCSAF  | VCGDYAACKS | [ 840] |
| #NC_003045.Bovine_coronavirus_isolate_BCoV-ENTSProtein_USA                                 | .....S..... | .....N.....     | .....S..... | .....N..... | .....S..... | .....N..... | .....S..... | .....N..... | .....D..... | .....T..... | .....T..... | [ 840]     |        |
| #EF424615.1Bovine_coronavirus_E-AH65_complete_genome                                       | .....S..... | .....N.....     | .....S..... | .....N..... | .....S..... | .....N..... | .....S..... | .....N..... | .....D..... | .....T..... | .....T..... | [ 840]     |        |
| #AF220295.1Bovine_coronavirus_strain_Quebec_complete_genome                                | .....S..... | .....N.....     | .....S..... | .....N..... | .....S..... | .....N..... | .....S..... | .....N..... | .....D..... | .....T..... | .....T..... | [ 840]     |        |
| #KT318118.1_Bovine_coronavirus_isolate_BCoV/FRA/EPI/Caen/2013/08_spike_glycoprotein        | .....S..... | .....N.....     | .....S..... | .....N..... | .....S..... | .....N..... | .....S..... | .....N..... | .....D..... | .....T..... | .....T..... | [ 840]     |        |
| #EU814648.1_Bovine_coronavirus_strain_438/06-TN-50_S_protein_(S)_gene_complete_cds         | .....S..... | .....N.....     | .....S..... | .....N..... | .....S..... | .....N..... | .....S..... | .....N..... | .....D..... | .....T..... | .....T..... | [ 840]     |        |
| #KF169910.1_Bovine_coronavirus_isolate_SWE/02-2_spike_glycoprotein_(S)_gene_complete_cds   | .....S..... | .....N.....     | .....S..... | .....N..... | .....S..... | .....N..... | .....S..... | .....N..... | .....D..... | .....T..... | .....T..... | [ 840]     |        |
| #KF169913.1_Bovine_coronavirus_isolate_DEN/03-1_spike_glycoprotein_(S)_gene_complete_cds   | .....S..... | .....N.....     | .....S..... | .....N..... | .....S..... | .....N..... | .....S..... | .....N..... | .....D..... | .....T..... | .....T..... | [ 840]     |        |
| #KF169934.1_Bovine_coronavirus_isolate_SWE/P/09-1_spike_glycoprotein_(S)_gene_complete_cds | .....S..... | .....N.....     | .....S..... | .....N..... | .....S..... | .....N..... | .....S..... | .....N..... | .....D..... | .....T..... | .....T..... | [ 840]     |        |
| #EU019216_Bovine_coronavirus_Bubalus/Italy/179/07-11gene_spike_protein_(S)_4.9_kDs         | .....S..... | .....N.....     | .....S..... | .....N..... | .....S..... | .....N..... | .....S..... | .....N..... | .....D..... | .....T..... | .....T..... | [ 840]     |        |
| #DQ389632.1_Bovine_coronavirus_isolate_KCD1_spike_glycoprotein_precursor_(S)_KOR           | .....V..... | .....S.....     | .....N..... | .....S..... | .....N..... | .....S..... | .....N..... | .....S..... | .....D..... | .....T..... | .....T..... | [ 840]     |        |
| #DQ389658.1_Bovine_coronavirus_isolate_KWD17_spike_glycoprotein_precursor_(S)_KOR          | .....S..... | .....RC.KP..... | .....S..... | .....N..... | .....S..... | .....N..... | .....S..... | .....N..... | .....D..... | .....T..... | .....T..... | [ 840]     |        |
| #KF169932.1_Bovine_coronavirus_isolate_SWE/C/08-2_spike_glycoprotein_(S)_gene_complete_cds | .....S..... | .....N.....     | .....S..... | .....N..... | .....S..... | .....N..... | .....S..... | .....N..... | .....D..... | .....T..... | .....T..... | [ 840]     |        |
| #KF169916.1_Bovine_coronavirus_isolate_DEN/05-1_spike_glycoprotein_(S)_gene_complete_cds   | .....S..... | .....N.....     | .....S..... | .....N..... | .....S..... | .....N..... | .....S..... | .....N..... | .....D..... | .....T..... | .....T..... | [ 840]     |        |
| #KF169918.1_Bovine_coronavirus_isolate_DEN/05-3_spike_glycoprotein_(S)_gene_complete_cds   | .....S..... | .....N.....     | .....S..... | .....N..... | .....S..... | .....N..... | .....S..... | .....N..... | .....D..... | .....T..... | .....T..... | [ 840]     |        |
| #EF193075.1_Bovine_coronavirus_strain_V270_1983_GER_spike_protein_gene                     | .....S..... | .....N.....     | .....S..... | .....N..... | .....S..... | .....N..... | .....S..... | .....N..... | .....D..... | .....T..... | .....T..... | [ 840]     |        |
| #DQ389637.1_Bovine_coronavirus_isolate_KCD6_spike_glycoprotein_precursor_(S)_gene-KOR      | .....S..... | .....N.....     | .....S..... | .....N..... | .....S..... | .....N..... | .....S..... | .....N..... | .....D..... | .....T..... | .....T..... | [ 840]     |        |
| #KF169908.1_Bovine_coronavirus_isolate_SWE/C/92_spike_glycoprotein_(S)_gene_complete_cds   | .....S..... | .....N.....     | .....S..... | .....N..... | .....S..... | .....N..... | .....S..... | .....N..... | .....D..... | .....T..... | .....T..... | [ 840]     |        |
| #D00731.1_Bovine_enteric_coronavirus_F15_1979_FRA_gene_for_spike_glycoprotein              | .....S..... | .....A.A.....   | .....S..... | .....V..... | .....N..... | .....S..... | .....N..... | .....S..... | .....D..... | .....C..... | .....T..... | [ 840]     |        |
| #ONT92942.Bovine_coronavirus_strain_ABGEBO-54_S_gene_Ireland                               | H.....      | .....S.....     | .....N..... | .....S..... | .....N..... | .....S..... | .....N..... | .....S..... | .....D..... | .....T..... | .....T..... | [ 840]     |        |
| #FJ938065.1Bovine_respiratory_coronavirus_AH187_complete_genome                            | .....S..... | .....I.....     | .....N..... | .....S..... | .....N..... | .....S..... | .....N..... | .....S..... | .....D..... | .....T..... | .....T..... | [ 840]     |        |
| #MG757144.1_Bovine_coronavirus_isolate_strain_ICSA17-LBA_spike_protein_(S)                 | .....S..... | .....N.....     | .....S..... | .....N..... | .....S..... | .....N..... | .....S..... | .....N..... | .....D..... | .....T..... | .....T..... | [ 840]     |        |
| #MG757140_Bovine_coronavirus_isolate_ICSA16-LBA_2014_France                                | .....S..... | .....N.....     | .....S..... | .....N..... | .....S..... | .....N..... | .....S..... | .....N..... | .....D..... | .....T..... | .....T..... | [ 840]     |        |
| #X2127-Marmot/Italy/193728-34/2023/CoV                                                     | .....S..... | .....N.....     | .....S..... | .....N..... | .....S..... | .....N..... | .....S..... | .....N..... | .....D..... | .....T..... | .....T..... | [ 840]     |        |
| #X2128-Marmot/Italy/193728-35/2023/CoV                                                     | .....S..... | .....N.....     | .....S..... | .....N..... | .....S..... | .....N..... | .....S..... | .....N..... | .....D..... | .....T..... | .....T..... | [ 840]     |        |

1st hydrophobic region

|                                                                                            |             |             |             |             |             |             |             |             |             |             |             |            |        |
|--------------------------------------------------------------------------------------------|-------------|-------------|-------------|-------------|-------------|-------------|-------------|-------------|-------------|-------------|-------------|------------|--------|
|                                                                                            | 850         | 860         | 870         | 880         | 890         | 900         | 910         | 920         | 930         | 940         | 950         |            |        |
| #U00735.2Bovine_coronavirus_strain_Mebus_complete_genome                                   | QLVEYGSFCD  | NINAILTEVN  | ELLDDTTQLQV | ANSLMNGVTL  | STLKLKDGVMF | NVDDINFSEV  | LGCLGSDCNK  | VSSRSAIEDL  | LFSKVKLSDV  | GFVEAYNNCT  | GGAEIRDILC  | VQSYNGIKVL | [ 960] |
| #NC_003045.Bovine_coronavirus_isolate_BCoV-ENTSProtein_USA                                 | .....S..... | [ 960]     |        |
| #EF424615.1Bovine_coronavirus_E-AH65_complete_genome                                       | .....S..... | [ 960]     |        |
| #AF220295.1Bovine_coronavirus_strain_Quebec_complete_genome                                | .....S..... | [ 960]     |        |
| #KT318118.1_Bovine_coronavirus_isolate_BCoV/FRA/EPI/Caen/2013/08_spike_glycoprotein        | .....S..... | [ 960]     |        |
| #EU814648.1_Bovine_coronavirus_strain_438/06-TN-50_S_protein_(S)_gene_complete_cds         | .....S..... | [ 960]     |        |
| #KF169910.1_Bovine_coronavirus_isolate_SWE/02-2_spike_glycoprotein_(S)_gene_complete_cds   | .....S..... | [ 960]     |        |
| #KF169913.1_Bovine_coronavirus_isolate_DEN/03-1_spike_glycoprotein_(S)_gene_complete_cds   | .....S..... | [ 960]     |        |
| #KF169934.1_Bovine_coronavirus_isolate_SWE/P/09-1_spike_glycoprotein_(S)_gene_complete_cds | .....S..... | [ 960]     |        |
| #EU019216_Bovine_coronavirus_Bubalus/Italy/179/07-11gene_spike_protein_(S)_4.9_kDs         | .....S..... | [ 960]     |        |
| #DQ389632.1_Bovine_coronavirus_isolate_KCD1_spike_glycoprotein_precursor_(S)_KOR           | .....S..... | [ 960]     |        |
| #DQ389658.1_Bovine_coronavirus_isolate_KWD17_spike_glycoprotein_precursor_(S)_KOR          | .....S..... | [ 960]     |        |
| #KF169932.1_Bovine_coronavirus_isolate_SWE/C/08-2_spike_glycoprotein_(S)_gene_complete_cds | .....S..... | [ 960]     |        |
| #KF169916.1_Bovine_coronavirus_isolate_DEN/05-1_spike_glycoprotein_(S)_gene_complete_cds   | .....S..... | [ 960]     |        |
| #KF169918.1_Bovine_coronavirus_isolate_DEN/05-3_spike_glycoprotein_(S)_gene_complete_cds   | .....S..... | [ 960]     |        |
| #EF193075.1_Bovine_coronavirus_strain_V270_1983_GER_spike_protein_gene                     | .....S..... | [ 960]     |        |
| #DQ389637.1_Bovine_coronavirus_isolate_KCD6_spike_glycoprotein_precursor_(S)_gene-KOR      | .....S..... | [ 960]     |        |
| #KF169908.1_Bovine_coronavirus_isolate_SWE/C/92_spike_glycoprotein_(S)_gene_complete_cds   | .....S..... | [ 960]     |        |
| #D00731.1_Bovine_enteric_coronavirus_F15_1979_FRA_gene_for_spike_glycoprotein              | .....S..... | [ 960]     |        |
| #ONT92942.Bovine_coronavirus_strain_ABGEBO-54_S_gene_Ireland                               | .....S..... | [ 960]     |        |
| #FJ938065.1Bovine_respiratory_coronavirus_AH187_complete_genome                            | .....S..... | [ 960]     |        |
| #MG757144.1_Bovine_coronavirus_isolate_strain_ICSA17-LBA_spike_protein_(S)                 | .....S..... | [ 960]     |        |
| #MG757140_Bovine_coronavirus_isolate_ICSA16-LBA_2014_France                                | .....S..... | [ 960]     |        |
| #X2127-Marmot/Italy/193728-34/2023/CoV                                                     | .....S..... | [ 960]     |        |
| #X2128-Marmot/Italy/193728-35/2023/CoV                                                     | .....S..... | [ 960]     |        |

1st hydrophobic region

HR-N domain

|                                                                                            |             |             |             |             |             |             |             |             |             |             |             |            |        |
|--------------------------------------------------------------------------------------------|-------------|-------------|-------------|-------------|-------------|-------------|-------------|-------------|-------------|-------------|-------------|------------|--------|
|                                                                                            | 970         | 980         | 990         | 1000        | 1010        | 1020        | 1030        | 1040        | 1050        | 1060        | 1070        |            |        |
| #U00735.2Bovine_coronavirus_strain_Mebus_complete_genome                                   | PPLLSVNGIS  | GYTLAATSAS  | LFPPLSAAVG  | VPEYLVNQVR  | INGIGVTMDV  | LSQNQKLIAN  | AFNNALDAIQ  | EGFDATNSAL  | VKIQAVNVAN  | AEALNNLLQQ  | LSNRFGAISS  | SLQEILSRID | [1080] |
| #NC_003045.Bovine_coronavirus_isolate_BCoV-ENTSProtein_USA                                 | .....E..... | .....W..... | [1080]     |        |
| #EF424615.1Bovine_coronavirus_E-AH65_complete_genome                                       | .....E..... | .....W..... | [1080]     |        |
| #AF220295.1Bovine_coronavirus_strain_Quebec_complete_genome                                | .....E..... | .....W..... | [1080]     |        |
| #KT318118.1_Bovine_coronavirus_isolate_BCoV/FRA/EPI/Caen/2013/08_spike_glycoprotein        | .....E..... | .....W..... | [1080]     |        |
| #EU814648.1_Bovine_coronavirus_strain_438/06-TN-50_S_protein_(S)_gene_complete_cds         | .....E..... | .....W..... | [1080]     |        |
| #KF169910.1_Bovine_coronavirus_isolate_SWE/02-2_spike_glycoprotein_(S)_gene_complete_cds   | .....E..... | .....W..... | [1080]     |        |
| #KF169913.1_Bovine_coronavirus_isolate_DEN/03-1_spike_glycoprotein_(S)_gene_complete_cds   | .....E..... | .....W..... | [1080]     |        |
| #KF169934.1_Bovine_coronavirus_isolate_SWE/P/09-1_spike_glycoprotein_(S)_gene_complete_cds | .....E..... | .....W..... | [1080]     |        |
| #EU019216_Bovine_coronavirus_Bubalus/Italy/179/07-11gene_spike_protein_(S)_4.9_kDs         | .....E..... | .....W..... | [1080]     |        |
| #DQ389632.1_Bovine_coronavirus_isolate_KCD1_spike_glycoprotein_precursor_(S)_KOR           | .....E..... | .....W..... | [1080]     |        |
| #DQ389658.1_Bovine_coronavirus_isolate_KWD17_spike_glycoprotein_precursor_(S)_KOR          | .....E..... | .....S..... | .....W..... | .....W..... | .....W..... | .....I..... | .....G..... | .....D..... | .....W..... | .....W..... | .....W..... | [1080]     |        |
| #KF169932.1_Bovine_coronavirus_isolate_SWE/C/08-2_spike_glycoprotein_(S)_gene_complete_cds | .....E..... | .....W..... | .....W..... | .....W..... | .....W..... | .....G..... | .....G..... | .....D..... | .....W..... | .....W..... | .....W..... | [1080]     |        |
| #KF169916.1_Bovine_coronavirus_isolate_DEN/05-1_spike_glycoprotein_(S)_gene_complete_cds   | .....E..... | .....W..... | .....W..... | .....W..... | .....W..... | .....G..... | .....G..... | .....S..... | .....W..... | .....W..... | .....W..... | [1080]     |        |
| #KF169918.1_Bovine_coronavirus_isolate_DEN/05-3_spike_glycoprotein_(S)_gene_complete_cds   | .....E..... | .....W..... | .....W..... | .....W..... | .....W..... | .....G..... | .....G..... | .....S..... | .....W..... | .....W..... | .....W..... | [1080]     |        |
| #EF193075.1_Bovine_coronavirus_strain_V270_1983_GER_spike_protein_gene                     | .....E..... | .....W..... | .....W..... | .....W..... | .....W..... | .....G..... | .....G..... | .....S..... | .....W..... | .....W..... | .....W..... | [1080]     |        |
| #DQ389637.1_Bovine_coronavirus_isolate_KCD6_spike_glycoprotein_precursor_(S)_gene-KOR      | .....E..... | .....W..... | .....W..... | .....W..... | .....W..... | .....G..... | .....G..... | .....D..... | .....W..... | .....W..... | .....W..... | [1080]     |        |



|                                                                                          |       |         |         |        |
|------------------------------------------------------------------------------------------|-------|---------|---------|--------|
| #KF169918.1 Bovine coronavirus isolate DEN/05-3 spike glycoprotein (S) gene complete cds | ..... | .K..... | .....   | [1365] |
| #EF193075.1 Bovine coronavirus strain V270 1983 GER spike protein gene                   | ..... | .....   | .....   | [1365] |
| #DQ389637.1 Bovine coronavirus isolate KCD6 spike glycoprotein precursor (S) gene-KOR    | ..... | .K..... | .....   | [1365] |
| #KF169908.1 Bovine coronavirus isolate SWE/C/92 spike glycoprotein (S) gene complete cds | ..... | .K..... | .....   | [1365] |
| #D00731.1 Bovine enteric coronavirus FI5 1979 FRA gene for spike glycoprotein            | ..... | .K..... | .....   | [1365] |
| #ON792942 Bovine coronavirus strain ABGEB0-54 S gene Ireland                             | ..... | .K..... | .....   | [1365] |
| #FJ938065.1 Bovine respiratory coronavirus AH187 complete genome                         | ..... | .K..... | ..E..   | [1365] |
| #MG757144.1 Bovine coronavirus isolate strain ICSA17-LBA spike protein (S)               | ..... | .S..... | .K..... | [1365] |
| #MG757140 Bovine coronavirus isolate ICSA16-LBA 2014 France                              | ..... | .K..... | .....   | [1365] |
| #X2127-Marmot/Italy/193728-34/2023/CoV                                                   | ..... | .K..... | ..E..   | [1365] |
| #X2128-Marmot/Italy/193728-35/2023/CoV                                                   | ..... | .K..... | ..E..   | [1365] |

Table S2- Molecular analysis of the amino acid (aa) sequences of the complete S protein of Italian marmots and reference and field B-CoV. Immune reactive domains (red) and regions important for virus-cell interactions (blue) are shown in boxes. Particular aa changes suggested as being linked to virulence factors (red), and enteric (green) and respiratory (blue) tropism are indicated by arrows [25]. Amino acid changes observed only in the marmots sequences are evidenced in yellow.



HE protein

| HE protein                                    | Signal peptide |    |    |    |    |    |    |    |    |     |     |     | Membrane proximal |   |   |   |   |   |   |   |   |   |  |   | Esterase |   |   |   |   |   |   |   |   |  |   |   | Lectin |   |   |   |   |   |   |   |  |   |   |   |   |   |   |   |   |   |  |   |   |   |   |   |   |   |   |   |   |  |   |   |   |   |   |   |   |   |   |   |  |   |   |   |   |   |   |   |   |   |   |  |   |   |   |   |   |   |   |   |   |   |  |   |   |   |   |   |   |   |   |   |  |   |   |   |   |   |   |   |   |   |   |   |  |   |   |   |   |   |   |   |   |   |   |  |  |  |  |  |  |  |  |  |  |  |  |  |  |  |  |  |  |  |  |  |  |  |  |  |  |  |  |  |  |  |  |  |  |  |  |  |  |  |  |  |  |  |  |  |  |  |  |  |  |  |  |  |  |  |  |  |  |  |  |  |  |  |  |  |  |  |  |  |  |  |  |  |  |  |  |  |  |  |  |  |  |  |  |  |  |  |  |  |  |  |  |  |  |  |  |  |  |  |  |  |  |  |  |  |  |  |  |  |  |  |  |  |  |  |  |  |  |  |  |  |  |  |  |  |  |  |  |  |  |  |  |  |  |  |  |  |  |  |  |  |  |  |  |  |  |  |  |  |  |  |  |  |  |  |  |  |  |  |  |  |  |  |  |  |  |  |  |  |  |  |  |  |  |  |  |  |  |  |  |  |  |  |  |  |  |  |  |  |  |  |  |  |  |  |  |  |  |  |  |  |  |  |  |  |  |  |  |  |  |  |  |  |  |  |  |  |  |  |  |  |  |  |  |  |  |  |  |  |  |  |  |  |  |  |  |  |  |  |  |  |  |  |  |  |  |  |  |  |  |  |  |  |  |  |  |  |  |  |  |  |  |  |  |  |  |  |  |  |  |  |  |  |  |  |  |  |  |  |  |  |  |  |  |  |  |  |  |  |  |  |  |  |  |  |  |  |  |  |  |  |  |  |  |  |  |  |  |  |  |  |  |  |  |  |  |  |  |  |  |  |  |  |  |  |  |  |  |  |  |  |  |  |  |  |  |  |  |  |  |  |  |  |  |  |  |  |  |  |  |  |  |  |  |  |  |  |  |  |  |  |  |  |  |  |  |  |  |  |  |  |  |  |  |  |  |  |  |  |  |  |  |  |  |  |  |  |  |  |  |  |  |  |  |  |  |  |  |  |  |  |  |  |  |  |  |  |  |  |  |  |  |  |  |  |  |  |  |  |  |  |  |  |  |  |  |  |  |  |  |  |  |  |  |  |  |  |  |  |  |  |  |  |  |  |  |  |  |  |  |  |  |  |  |  |  |  |  |  |  |  |  |  |  |  |  |  |  |  |  |  |  |  |  |  |  |  |  |  |  |  |  |  |  |  |  |  |  |  |  |  |  |  |  |  |  |  |  |  |  |  |  |  |  |  |  |  |  |  |  |  |  |  |  |  |  |  |  |  |  |  |  |  |  |  |  |  |  |  |  |  |  |  |  |  |  |  |  |  |  |  |  |  |  |  |  |  |  |  |  |  |  |  |  |  |  |  |  |  |  |  |  |  |  |  |  |  |  |  |  |  |  |  |  |  |  |  |  |  |  |  |  |  |  |  |  |  |  |  |  |  |  |  |  |  |  |  |  |  |  |  |  |  |  |  |  |  |  |  |  |  |  |  |  |  |  |  |  |  |  |  |  |  |  |  |  |  |  |  |  |  |  |  |  |  |  |  |  |  |  |  |  |  |  |  |  |  |  |  |  |  |  |  |  |  |  |  |  |  |  |  |  |  |  |  |  |  |  |  |  |  |  |  |  |  |  |  |  |  |  |  |  |  |  |  |  |  |  |  |  |  |  |  |  |  |  |  |  |  |  |  |  |  |  |  |  |  |  |  |  |  |  |  |  |  |  |  |  |  |  |  |  |  |  |  |  |  |  |  |  |  |  |  |  |  |  |  |  |  |  |  |  |  |  |  |  |  |  |  |  |  |  |  |  |  |  |  |  |  |  |  |  |  |  |  |  |  |  |  |  |  |  |  |  |  |  |  |  |  |  |  |  |  |  |  |  |  |  |  |  |  |  |  |  |  |  |  |  |  |  |  |  |  |  |  |  |  |  |  |  |  |  |  |  |  |  |  |  |  |  |  |  |  |  |  |  |  |  |  |  |  |  |  |  |  |  |  |  |  |  |  |  |  |  |  |  |  |  |  |  |  |  |  |  |  |  |  |  |  |  |  |  |  |  |  |  |  |  |  |  |  |  |  |  |  |  |  |  |  |  |  |  |  |  |  |  |  |  |  |  |  |  |  |  |  |  |  |  |  |  |  |  |  |  |  |  |  |  |  |  |  |  |  |  |  |  |  |  |  |  |  |  |  |  |  |  |  |  |  |  |  |  |  |  |  |  |  |  |  |  |  |  |  |  |  |  |  |  |  |  |  |  |  |  |  |  |  |  |  |  |  |  |  |  |  |  |  |  |  |  |  |  |  |  |  |  |  |  |  |  |  |  |  |  |  |  |  |  |  |  |  |  |  |  |  |  |  |  |  |  |  |  |  |  |  |  |  |  |  |  |  |  |  |  |  |  |  |  |  |  |  |  |  |  |  |  |  |  |  |  |  |  |  |  |  |  |  |  |  |  |  |  |  |  |  |  |  |  |  |  |  |  |  |  |  |  |  |  |  |  |  |  |  |  |  |  |  |  |  |  |  |  |  |  |  |  |  |  |  |  |  |  |  |  |  |  |  |  |  |  |  |  |  |  |  |  |  |  |  |  |  |  |  |  |  |  |  |  |  |  |  |  |  |  |  |  |  |  |  |  |  |  |  |  |  |  |  |  |  |  |  |  |  |  |  |  |  |  |  |  |  |  |  |  |  |  |  |  |  |  |  |  |  |  |  |  |  |  |  |  |  |  |  |  |  |  |  |  |  |  |  |  |  |  |  |  |  |  |  |  |  |  |  |  |  |  |  |  |  |  |  |  |  |  |  |  |  |  |  |  |  |  |  |  |  |  |  |  |  |  |  |  |  |  |  |  |  |  |  |  |  |  |  |  |  |  |  |  |  |  |  |  |  |  |  |  |  |  |  |  |  |  |  |  |  |  |  |  |  |  |  |  |  |  |  |  |  |  |  |  |  |  |  |  |  |  |  |  |  |  |  |  |  |  |  |  |  |  |  |  |  |  |  |  |  |  |  |  |  |  |  |  |  |  |  |  |  |  |  |  |  |  |  |  |  |  |  |  |  |  |  |  |  |  |  |  |  |  |  |  |  |  |  |  |  |  |  |  |  |  |  |  |  |  |  |  |  |  |  |  |  |  |  |  |  |  |  |  |  |  |  |  |  |  |  |  |  |  |  |  |  |  |  |  |  |  |  |  |  |  |  |  |  |  |  |  |  |  |  |  |  |  |  |  |  |  |  |  |  |  |  |  |  |  |  |  |  |  |  |  |  |  |  |  |  |  |  |  |  |  |  |
|-----------------------------------------------|----------------|----|----|----|----|----|----|----|----|-----|-----|-----|-------------------|---|---|---|---|---|---|---|---|---|--|---|----------|---|---|---|---|---|---|---|---|--|---|---|--------|---|---|---|---|---|---|---|--|---|---|---|---|---|---|---|---|---|--|---|---|---|---|---|---|---|---|---|---|--|---|---|---|---|---|---|---|---|---|---|--|---|---|---|---|---|---|---|---|---|---|--|---|---|---|---|---|---|---|---|---|---|--|---|---|---|---|---|---|---|---|---|--|---|---|---|---|---|---|---|---|---|---|---|--|---|---|---|---|---|---|---|---|---|---|--|--|--|--|--|--|--|--|--|--|--|--|--|--|--|--|--|--|--|--|--|--|--|--|--|--|--|--|--|--|--|--|--|--|--|--|--|--|--|--|--|--|--|--|--|--|--|--|--|--|--|--|--|--|--|--|--|--|--|--|--|--|--|--|--|--|--|--|--|--|--|--|--|--|--|--|--|--|--|--|--|--|--|--|--|--|--|--|--|--|--|--|--|--|--|--|--|--|--|--|--|--|--|--|--|--|--|--|--|--|--|--|--|--|--|--|--|--|--|--|--|--|--|--|--|--|--|--|--|--|--|--|--|--|--|--|--|--|--|--|--|--|--|--|--|--|--|--|--|--|--|--|--|--|--|--|--|--|--|--|--|--|--|--|--|--|--|--|--|--|--|--|--|--|--|--|--|--|--|--|--|--|--|--|--|--|--|--|--|--|--|--|--|--|--|--|--|--|--|--|--|--|--|--|--|--|--|--|--|--|--|--|--|--|--|--|--|--|--|--|--|--|--|--|--|--|--|--|--|--|--|--|--|--|--|--|--|--|--|--|--|--|--|--|--|--|--|--|--|--|--|--|--|--|--|--|--|--|--|--|--|--|--|--|--|--|--|--|--|--|--|--|--|--|--|--|--|--|--|--|--|--|--|--|--|--|--|--|--|--|--|--|--|--|--|--|--|--|--|--|--|--|--|--|--|--|--|--|--|--|--|--|--|--|--|--|--|--|--|--|--|--|--|--|--|--|--|--|--|--|--|--|--|--|--|--|--|--|--|--|--|--|--|--|--|--|--|--|--|--|--|--|--|--|--|--|--|--|--|--|--|--|--|--|--|--|--|--|--|--|--|--|--|--|--|--|--|--|--|--|--|--|--|--|--|--|--|--|--|--|--|--|--|--|--|--|--|--|--|--|--|--|--|--|--|--|--|--|--|--|--|--|--|--|--|--|--|--|--|--|--|--|--|--|--|--|--|--|--|--|--|--|--|--|--|--|--|--|--|--|--|--|--|--|--|--|--|--|--|--|--|--|--|--|--|--|--|--|--|--|--|--|--|--|--|--|--|--|--|--|--|--|--|--|--|--|--|--|--|--|--|--|--|--|--|--|--|--|--|--|--|--|--|--|--|--|--|--|--|--|--|--|--|--|--|--|--|--|--|--|--|--|--|--|--|--|--|--|--|--|--|--|--|--|--|--|--|--|--|--|--|--|--|--|--|--|--|--|--|--|--|--|--|--|--|--|--|--|--|--|--|--|--|--|--|--|--|--|--|--|--|--|--|--|--|--|--|--|--|--|--|--|--|--|--|--|--|--|--|--|--|--|--|--|--|--|--|--|--|--|--|--|--|--|--|--|--|--|--|--|--|--|--|--|--|--|--|--|--|--|--|--|--|--|--|--|--|--|--|--|--|--|--|--|--|--|--|--|--|--|--|--|--|--|--|--|--|--|--|--|--|--|--|--|--|--|--|--|--|--|--|--|--|--|--|--|--|--|--|--|--|--|--|--|--|--|--|--|--|--|--|--|--|--|--|--|--|--|--|--|--|--|--|--|--|--|--|--|--|--|--|--|--|--|--|--|--|--|--|--|--|--|--|--|--|--|--|--|--|--|--|--|--|--|--|--|--|--|--|--|--|--|--|--|--|--|--|--|--|--|--|--|--|--|--|--|--|--|--|--|--|--|--|--|--|--|--|--|--|--|--|--|--|--|--|--|--|--|--|--|--|--|--|--|--|--|--|--|--|--|--|--|--|--|--|--|--|--|--|--|--|--|--|--|--|--|--|--|--|--|--|--|--|--|--|--|--|--|--|--|--|--|--|--|--|--|--|--|--|--|--|--|--|--|--|--|--|--|--|--|--|--|--|--|--|--|--|--|--|--|--|--|--|--|--|--|--|--|--|--|--|--|--|--|--|--|--|--|--|--|--|--|--|--|--|--|--|--|--|--|--|--|--|--|--|--|--|--|--|--|--|--|--|--|--|--|--|--|--|--|--|--|--|--|--|--|--|--|--|--|--|--|--|--|--|--|--|--|--|--|--|--|--|--|--|--|--|--|--|--|--|--|--|--|--|--|--|--|--|--|--|--|--|--|--|--|--|--|--|--|--|--|--|--|--|--|--|--|--|--|--|--|--|--|--|--|--|--|--|--|--|--|--|--|--|--|--|--|--|--|--|--|--|--|--|--|--|--|--|--|--|--|--|--|--|--|--|--|--|--|--|--|--|--|--|--|--|--|--|--|--|--|--|--|--|--|--|--|--|--|--|--|--|--|--|--|--|--|--|--|--|--|--|--|--|--|--|--|--|--|--|--|--|--|--|--|--|--|--|--|--|--|--|--|--|--|--|--|--|--|--|--|--|--|--|--|--|--|--|--|--|--|--|--|--|--|--|--|--|--|--|--|--|--|--|--|--|--|--|--|--|--|--|--|--|--|--|--|--|--|--|--|--|--|--|--|--|--|--|--|--|--|--|--|--|--|--|--|--|--|--|--|--|--|--|--|--|--|--|--|--|--|--|--|--|--|--|--|--|--|--|--|--|--|--|--|--|--|--|--|--|--|--|--|--|--|--|--|--|--|--|--|--|--|--|--|--|--|--|--|--|--|--|--|--|--|--|--|--|--|--|--|--|--|--|--|--|--|--|--|--|--|--|--|--|--|--|--|--|--|--|--|--|--|--|--|--|--|--|--|--|--|--|--|--|--|--|--|--|--|--|--|--|--|--|--|--|--|--|--|--|--|--|--|--|--|--|--|--|--|--|--|--|--|--|--|--|--|--|--|--|--|--|--|--|--|--|--|--|--|--|--|--|--|--|--|--|--|--|--|--|--|--|--|--|--|--|--|--|--|--|--|--|--|--|--|--|--|--|--|--|--|--|--|--|--|--|--|--|--|--|--|--|--|--|--|--|--|--|--|--|--|--|--|--|--|--|--|--|--|--|--|--|--|--|--|--|--|--|--|--|--|--|--|--|--|--|--|--|--|--|--|--|--|--|--|--|--|--|--|--|--|--|--|--|--|--|--|--|--|--|--|--|--|--|--|--|--|--|--|--|--|--|--|--|--|--|--|--|--|--|--|--|--|--|--|--|--|--|--|--|--|--|--|--|--|--|--|--|--|--|--|--|--|--|--|--|--|--|--|--|--|--|--|--|--|--|--|--|--|--|--|--|--|--|--|--|--|--|--|--|
|                                               |                |    |    |    |    |    |    |    |    |     |     |     |                   |   |   |   |   |   |   |   |   |   |  |   |          |   |   |   |   |   |   |   |   |  |   |   |        |   |   |   |   |   |   |   |  |   |   |   |   |   |   |   |   |   |  |   |   |   |   |   |   |   |   |   |   |  |   |   |   |   |   |   |   |   |   |   |  |   |   |   |   |   |   |   |   |   |   |  |   |   |   |   |   |   |   |   |   |   |  |   |   |   |   |   |   |   |   |   |  |   |   |   |   |   |   |   |   |   |   |   |  |   |   |   |   |   |   |   |   |   |   |  |  |  |  |  |  |  |  |  |  |  |  |  |  |  |  |  |  |  |  |  |  |  |  |  |  |  |  |  |  |  |  |  |  |  |  |  |  |  |  |  |  |  |  |  |  |  |  |  |  |  |  |  |  |  |  |  |  |  |  |  |  |  |  |  |  |  |  |  |  |  |  |  |  |  |  |  |  |  |  |  |  |  |  |  |  |  |  |  |  |  |  |  |  |  |  |  |  |  |  |  |  |  |  |  |  |  |  |  |  |  |  |  |  |  |  |  |  |  |  |  |  |  |  |  |  |  |  |  |  |  |  |  |  |  |  |  |  |  |  |  |  |  |  |  |  |  |  |  |  |  |  |  |  |  |  |  |  |  |  |  |  |  |  |  |  |  |  |  |  |  |  |  |  |  |  |  |  |  |  |  |  |  |  |  |  |  |  |  |  |  |  |  |  |  |  |  |  |  |  |  |  |  |  |  |  |  |  |  |  |  |  |  |  |  |  |  |  |  |  |  |  |  |  |  |  |  |  |  |  |  |  |  |  |  |  |  |  |  |  |  |  |  |  |  |  |  |  |  |  |  |  |  |  |  |  |  |  |  |  |  |  |  |  |  |  |  |  |  |  |  |  |  |  |  |  |  |  |  |  |  |  |  |  |  |  |  |  |  |  |  |  |  |  |  |  |  |  |  |  |  |  |  |  |  |  |  |  |  |  |  |  |  |  |  |  |  |  |  |  |  |  |  |  |  |  |  |  |  |  |  |  |  |  |  |  |  |  |  |  |  |  |  |  |  |  |  |  |  |  |  |  |  |  |  |  |  |  |  |  |  |  |  |  |  |  |  |  |  |  |  |  |  |  |  |  |  |  |  |  |  |  |  |  |  |  |  |  |  |  |  |  |  |  |  |  |  |  |  |  |  |  |  |  |  |  |  |  |  |  |  |  |  |  |  |  |  |  |  |  |  |  |  |  |  |  |  |  |  |  |  |  |  |  |  |  |  |  |  |  |  |  |  |  |  |  |  |  |  |  |  |  |  |  |  |  |  |  |  |  |  |  |  |  |  |  |  |  |  |  |  |  |  |  |  |  |  |  |  |  |  |  |  |  |  |  |  |  |  |  |  |  |  |  |  |  |  |  |  |  |  |  |  |  |  |  |  |  |  |  |  |  |  |  |  |  |  |  |  |  |  |  |  |  |  |  |  |  |  |  |  |  |  |  |  |  |  |  |  |  |  |  |  |  |  |  |  |  |  |  |  |  |  |  |  |  |  |  |  |  |  |  |  |  |  |  |  |  |  |  |  |  |  |  |  |  |  |  |  |  |  |  |  |  |  |  |  |  |  |  |  |  |  |  |  |  |  |  |  |  |  |  |  |  |  |  |  |  |  |  |  |  |  |  |  |  |  |  |  |  |  |  |  |  |  |  |  |  |  |  |  |  |  |  |  |  |  |  |  |  |  |  |  |  |  |  |  |  |  |  |  |  |  |  |  |  |  |  |  |  |  |  |  |  |  |  |  |  |  |  |  |  |  |  |  |  |  |  |  |  |  |  |  |  |  |  |  |  |  |  |  |  |  |  |  |  |  |  |  |  |  |  |  |  |  |  |  |  |  |  |  |  |  |  |  |  |  |  |  |  |  |  |  |  |  |  |  |  |  |  |  |  |  |  |  |  |  |  |  |  |  |  |  |  |  |  |  |  |  |  |  |  |  |  |  |  |  |  |  |  |  |  |  |  |  |  |  |  |  |  |  |  |  |  |  |  |  |  |  |  |  |  |  |  |  |  |  |  |  |  |  |  |  |  |  |  |  |  |  |  |  |  |  |  |  |  |  |  |  |  |  |  |  |  |  |  |  |  |  |  |  |  |  |  |  |  |  |  |  |  |  |  |  |  |  |  |  |  |  |  |  |  |  |  |  |  |  |  |  |  |  |  |  |  |  |  |  |  |  |  |  |  |  |  |  |  |  |  |  |  |  |  |  |  |  |  |  |  |  |  |  |  |  |  |  |  |  |  |  |  |  |  |  |  |  |  |  |  |  |  |  |  |  |  |  |  |  |  |  |  |  |  |  |  |  |  |  |  |  |  |  |  |  |  |  |  |  |  |  |  |  |  |  |  |  |  |  |  |  |  |  |  |  |  |  |  |  |  |  |  |  |  |  |  |  |  |  |  |  |  |  |  |  |  |  |  |  |  |  |  |  |  |  |  |  |  |  |  |  |  |  |  |  |  |  |  |  |  |  |  |  |  |  |  |  |  |  |  |  |  |  |  |  |  |  |  |  |  |  |  |  |  |  |  |  |  |  |  |  |  |  |  |  |  |  |  |  |  |  |  |  |  |  |  |  |  |  |  |  |  |  |  |  |  |  |  |  |  |  |  |  |  |  |  |  |  |  |  |  |  |  |  |  |  |  |  |  |  |  |  |  |  |  |  |  |  |  |  |  |  |  |  |  |  |  |  |  |  |  |  |  |  |  |  |  |  |  |  |  |  |  |  |  |  |  |  |  |  |  |  |  |  |  |  |  |  |  |  |  |  |  |  |  |  |  |  |  |  |  |  |  |  |  |  |  |  |  |  |  |  |  |  |  |  |  |  |  |  |  |  |  |  |  |  |  |  |  |  |  |  |  |  |  |  |  |  |  |  |  |  |  |  |  |  |  |  |  |  |  |  |  |  |  |  |  |  |  |  |  |  |  |  |  |  |  |  |  |  |  |  |  |  |  |  |  |  |  |  |  |  |  |  |  |  |  |  |  |  |  |  |  |  |  |  |  |  |  |  |  |  |  |  |  |  |  |  |  |  |  |  |  |  |  |  |  |  |  |  |  |  |  |  |  |  |  |  |  |  |  |  |  |  |  |  |  |  |  |  |  |  |  |  |  |  |  |  |  |  |  |  |  |  |  |  |  |  |  |  |  |  |  |  |  |  |  |  |  |  |  |  |  |  |  |  |  |  |  |  |  |  |  |  |  |  |  |  |  |  |  |  |  |  |  |  |  |  |  |  |  |  |  |  |  |  |  |  |  |  |  |  |  |  |  |  |  |  |  |  |  |  |  |  |  |  |  |  |  |  |  |  |  |  |  |  |  |  |  |  |  |  |  |  |  |  |  |  |  |  |  |  |  |  |  |  |  |  |  |  |  |  |  |  |  |  |  |  |  |  |  |  |  |  |  |  |  |  |  |  |  |  |  |
|                                               | 10             | 20 | 30 | 40 | 50 | 60 | 70 | 80 | 90 | 100 | 110 | 120 |                   |   |   |   |   |   |   |   |   |   |  |   |          |   |   |   |   |   |   |   |   |  |   |   |        |   |   |   |   |   |   |   |  |   |   |   |   |   |   |   |   |   |  |   |   |   |   |   |   |   |   |   |   |  |   |   |   |   |   |   |   |   |   |   |  |   |   |   |   |   |   |   |   |   |   |  |   |   |   |   |   |   |   |   |   |   |  |   |   |   |   |   |   |   |   |   |  |   |   |   |   |   |   |   |   |   |   |   |  |   |   |   |   |   |   |   |   |   |   |  |  |  |  |  |  |  |  |  |  |  |  |  |  |  |  |  |  |  |  |  |  |  |  |  |  |  |  |  |  |  |  |  |  |  |  |  |  |  |  |  |  |  |  |  |  |  |  |  |  |  |  |  |  |  |  |  |  |  |  |  |  |  |  |  |  |  |  |  |  |  |  |  |  |  |  |  |  |  |  |  |  |  |  |  |  |  |  |  |  |  |  |  |  |  |  |  |  |  |  |  |  |  |  |  |  |  |  |  |  |  |  |  |  |  |  |  |  |  |  |  |  |  |  |  |  |  |  |  |  |  |  |  |  |  |  |  |  |  |  |  |  |  |  |  |  |  |  |  |  |  |  |  |  |  |  |  |  |  |  |  |  |  |  |  |  |  |  |  |  |  |  |  |  |  |  |  |  |  |  |  |  |  |  |  |  |  |  |  |  |  |  |  |  |  |  |  |  |  |  |  |  |  |  |  |  |  |  |  |  |  |  |  |  |  |  |  |  |  |  |  |  |  |  |  |  |  |  |  |  |  |  |  |  |  |  |  |  |  |  |  |  |  |  |  |  |  |  |  |  |  |  |  |  |  |  |  |  |  |  |  |  |  |  |  |  |  |  |  |  |  |  |  |  |  |  |  |  |  |  |  |  |  |  |  |  |  |  |  |  |  |  |  |  |  |  |  |  |  |  |  |  |  |  |  |  |  |  |  |  |  |  |  |  |  |  |  |  |  |  |  |  |  |  |  |  |  |  |  |  |  |  |  |  |  |  |  |  |  |  |  |  |  |  |  |  |  |  |  |  |  |  |  |  |  |  |  |  |  |  |  |  |  |  |  |  |  |  |  |  |  |  |  |  |  |  |  |  |  |  |  |  |  |  |  |  |  |  |  |  |  |  |  |  |  |  |  |  |  |  |  |  |  |  |  |  |  |  |  |  |  |  |  |  |  |  |  |  |  |  |  |  |  |  |  |  |  |  |  |  |  |  |  |  |  |  |  |  |  |  |  |  |  |  |  |  |  |  |  |  |  |  |  |  |  |  |  |  |  |  |  |  |  |  |  |  |  |  |  |  |  |  |  |  |  |  |  |  |  |  |  |  |  |  |  |  |  |  |  |  |  |  |  |  |  |  |  |  |  |  |  |  |  |  |  |  |  |  |  |  |  |  |  |  |  |  |  |  |  |  |  |  |  |  |  |  |  |  |  |  |  |  |  |  |  |  |  |  |  |  |  |  |  |  |  |  |  |  |  |  |  |  |  |  |  |  |  |  |  |  |  |  |  |  |  |  |  |  |  |  |  |  |  |  |  |  |  |  |  |  |  |  |  |  |  |  |  |  |  |  |  |  |  |  |  |  |  |  |  |  |  |  |  |  |  |  |  |  |  |  |  |  |  |  |  |  |  |  |  |  |  |  |  |  |  |  |  |  |  |  |  |  |  |  |  |  |  |  |  |  |  |  |  |  |  |  |  |  |  |  |  |  |  |  |  |  |  |  |  |  |  |  |  |  |  |  |  |  |  |  |  |  |  |  |  |  |  |  |  |  |  |  |  |  |  |  |  |  |  |  |  |  |  |  |  |  |  |  |  |  |  |  |  |  |  |  |  |  |  |  |  |  |  |  |  |  |  |  |  |  |  |  |  |  |  |  |  |  |  |  |  |  |  |  |  |  |  |  |  |  |  |  |  |  |  |  |  |  |  |  |  |  |  |  |  |  |  |  |  |  |  |  |  |  |  |  |  |  |  |  |  |  |  |  |  |  |  |  |  |  |  |  |  |  |  |  |  |  |  |  |  |  |  |  |  |  |  |  |  |  |  |  |  |  |  |  |  |  |  |  |  |  |  |  |  |  |  |  |  |  |  |  |  |  |  |  |  |  |  |  |  |  |  |  |  |  |  |  |  |  |  |  |  |  |  |  |  |  |  |  |  |  |  |  |  |  |  |  |  |  |  |  |  |  |  |  |  |  |  |  |  |  |  |  |  |  |  |  |  |  |  |  |  |  |  |  |  |  |  |  |  |  |  |  |  |  |  |  |  |  |  |  |  |  |  |  |  |  |  |  |  |  |  |  |  |  |  |  |  |  |  |  |  |  |  |  |  |  |  |  |  |  |  |  |  |  |  |  |  |  |  |  |  |  |  |  |  |  |  |  |  |  |  |  |  |  |  |  |  |  |  |  |  |  |  |  |  |  |  |  |  |  |  |  |  |  |  |  |  |  |  |  |  |  |  |  |  |  |  |  |  |  |  |  |  |  |  |  |  |  |  |  |  |  |  |  |  |  |  |  |  |  |  |  |  |  |  |  |  |  |  |  |  |  |  |  |  |  |  |  |  |  |  |  |  |  |  |  |  |  |  |  |  |  |  |  |  |  |  |  |  |  |  |  |  |  |  |  |  |  |  |  |  |  |  |  |  |  |  |  |  |  |  |  |  |  |  |  |  |  |  |  |  |  |  |  |  |  |  |  |  |  |  |  |  |  |  |  |  |  |  |  |  |  |  |  |  |  |  |  |  |  |  |  |  |  |  |  |  |  |  |  |  |  |  |  |  |  |  |  |  |  |  |  |  |  |  |  |  |  |  |  |  |  |  |  |  |  |  |  |  |  |  |  |  |  |  |  |  |  |  |  |  |  |  |  |  |  |  |  |  |  |  |  |  |  |  |  |  |  |  |  |  |  |  |  |  |  |  |  |  |  |  |  |  |  |  |  |  |  |  |  |  |  |  |  |  |  |  |  |  |  |  |  |  |  |  |  |  |  |  |  |  |  |  |  |  |  |  |  |  |  |  |  |  |  |  |  |  |  |  |  |  |  |  |  |  |  |  |  |  |  |  |  |  |  |  |  |  |  |  |  |  |  |  |  |  |  |  |  |  |  |  |  |  |  |  |  |  |  |  |  |  |  |  |  |  |  |  |  |  |  |  |  |  |  |  |  |  |  |  |  |  |  |  |  |  |  |  |  |  |  |  |  |  |  |  |  |  |  |  |  |  |  |  |  |  |  |  |  |  |  |  |  |  |  |  |  |  |  |  |  |  |  |  |  |  |  |  |  |  |  |  |  |  |  |  |  |  |  |  |  |  |  |  |  |  |  |  |  |  |  |  |  |  |  |  |  |  |  |  |  |  |  |  |  |  |  |  |  |  |  |  |  |  |  |  |  |  |  |  |  |  |  |  |  |  |  |  |  |  |
| #U00735.2_Bovine_coronavirus_strain_Mebus_USA | M              | F  | L  | L  | R  | F  | L  | V  | I  | V   |     |     | S                 | C | I | I | G | S | L | G | F | D |  | N | P        | P | T | N | V | V | S | H | L |  | N | G | D      | W | F | L | F | G | D | S |  | R | S | D | C | N | H | V | N | T |  | N | P | R | N | Y | S | Y | M | D | L |  | N | P | A | L | C | D | S | G | K | I |  | S | S | K | A | G | N | S | I | F | R |  | S | F | H | F | T | D | F | Y | N | Y |  | T | G | E | G | Q | Q | I | F | Y |  | E | G | V | N | F | P | T | F | Y | H | A |  | F | K | C | T | T | S | G | S | N | D |  |  |  |  |  |  |  |  |  |  |  |  |  |  |  |  |  |  |  |  |  |  |  |  |  |  |  |  |  |  |  |  |  |  |  |  |  |  |  |  |  |  |  |  |  |  |  |  |  |  |  |  |  |  |  |  |  |  |  |  |  |  |  |  |  |  |  |  |  |  |  |  |  |  |  |  |  |  |  |  |  |  |  |  |  |  |  |  |  |  |  |  |  |  |  |  |  |  |  |  |  |  |  |  |  |  |  |  |  |  |  |  |  |  |  |  |  |  |  |  |  |  |  |  |  |  |  |  |  |  |  |  |  |  |  |  |  |  |  |  |  |  |  |  |  |  |  |  |  |  |  |  |  |  |  |  |  |  |  |  |  |  |  |  |  |  |  |  |  |  |  |  |  |  |  |  |  |  |  |  |  |  |  |  |  |  |  |  |  |  |  |  |  |  |  |  |  |  |  |  |  |  |  |  |  |  |  |  |  |  |  |  |  |  |  |  |  |  |  |  |  |  |  |  |  |  |  |  |  |  |  |  |  |  |  |  |  |  |  |  |  |  |  |  |  |  |  |  |  |  |  |  |  |  |  |  |  |  |  |  |  |  |  |  |  |  |  |  |  |  |  |  |  |  |  |  |  |  |  |  |  |  |  |  |  |  |  |  |  |  |  |  |  |  |  |  |  |  |  |  |  |  |  |  |  |  |  |  |  |  |  |  |  |  |  |  |  |  |  |  |  |  |  |  |  |  |  |  |  |  |  |  |  |  |  |  |  |  |  |  |  |  |  |  |  |  |  |  |  |  |  |  |  |  |  |  |  |  |  |  |  |  |  |  |  |  |  |  |  |  |  |  |  |  |  |  |  |  |  |  |  |  |  |  |  |  |  |  |  |  |  |  |  |  |  |  |  |  |  |  |  |  |  |  |  |  |  |  |  |  |  |  |  |  |  |  |  |  |  |  |  |  |  |  |  |  |  |  |  |  |  |  |  |  |  |  |  |  |  |  |  |  |  |  |  |  |  |  |  |  |  |  |  |  |  |  |  |  |  |  |  |  |  |  |  |  |  |  |  |  |  |  |  |  |  |  |  |  |  |  |  |  |  |  |  |  |  |  |  |  |  |  |  |  |  |  |  |  |  |  |  |  |  |  |  |  |  |  |  |  |  |  |  |  |  |  |  |  |  |  |  |  |  |  |  |  |  |  |  |  |  |  |  |  |  |  |  |  |  |  |  |  |  |  |  |  |  |  |  |  |  |  |  |  |  |  |  |  |  |  |  |  |  |  |  |  |  |  |  |  |  |  |  |  |  |  |  |  |  |  |  |  |  |  |  |  |  |  |  |  |  |  |  |  |  |  |  |  |  |  |  |  |  |  |  |  |  |  |  |  |  |  |  |  |  |  |  |  |  |  |  |  |  |  |  |  |  |  |  |  |  |  |  |  |  |  |  |  |  |  |  |  |  |  |  |  |  |  |  |  |  |  |  |  |  |  |  |  |  |  |  |  |  |  |  |  |  |  |  |  |  |  |  |  |  |  |  |  |  |  |  |  |  |  |  |  |  |  |  |  |  |  |  |  |  |  |  |  |  |  |  |  |  |  |  |  |  |  |  |  |  |  |  |  |  |  |  |  |  |  |  |  |  |  |  |  |  |  |  |  |  |  |  |  |  |  |  |  |  |  |  |  |  |  |  |  |  |  |  |  |  |  |  |  |  |  |  |  |  |  |  |  |  |  |  |  |  |  |  |  |  |  |  |  |  |  |  |  |  |  |  |  |  |  |  |  |  |  |  |  |  |  |  |  |  |  |  |  |  |  |  |  |  |  |  |  |  |  |  |  |  |  |  |  |  |  |  |  |  |  |  |  |  |  |  |  |  |  |  |  |  |  |  |  |  |  |  |  |  |  |  |  |  |  |  |  |  |  |  |  |  |  |  |  |  |  |  |  |  |  |  |  |  |  |  |  |  |  |  |  |  |  |  |  |  |  |  |  |  |  |  |  |  |  |  |  |  |  |  |  |  |  |  |  |  |  |  |  |  |  |  |  |  |  |  |  |  |  |  |  |  |  |  |  |  |  |  |  |  |  |  |  |  |  |  |  |  |  |  |  |  |  |  |  |  |  |  |  |  |  |  |  |  |  |  |  |  |  |  |  |  |  |  |  |  |  |  |  |  |  |  |  |  |  |  |  |  |  |  |  |  |  |  |  |  |  |  |  |  |  |  |  |  |  |  |  |  |  |  |  |  |  |  |  |  |  |  |  |  |  |  |  |  |  |  |  |  |  |  |  |  |  |  |  |  |  |  |  |  |  |  |  |  |  |  |  |  |  |  |  |  |  |  |  |  |  |  |  |  |  |  |  |  |  |  |  |  |  |  |  |  |  |  |  |  |  |  |  |  |  |  |  |  |  |  |  |  |  |  |  |  |  |  |  |  |  |  |  |  |  |  |  |  |  |  |  |  |  |  |  |  |  |  |  |  |  |  |  |  |  |  |  |  |  |  |  |  |  |  |  |  |  |  |  |  |  |  |  |  |  |  |  |  |  |  |  |  |  |  |  |  |  |  |  |  |  |  |  |  |  |  |  |  |  |  |  |  |  |  |  |  |  |  |  |  |  |  |  |  |  |  |  |  |  |  |  |  |  |  |  |  |  |  |  |  |  |  |  |  |  |  |  |  |  |  |  |  |  |  |  |  |  |  |  |  |  |  |  |  |  |  |  |  |  |  |  |  |  |  |  |  |  |  |  |  |  |  |  |  |  |  |  |  |  |  |  |  |  |  |  |  |  |  |  |  |  |  |  |  |  |  |  |  |  |  |  |  |  |  |  |  |  |  |  |  |  |  |  |  |  |  |  |  |  |  |  |  |  |  |  |  |  |  |  |  |  |  |  |  |  |  |  |  |  |  |  |  |  |  |  |  |  |  |  |  |  |  |  |  |  |  |  |  |  |  |  |  |  |  |  |  |  |  |  |  |  |  |  |  |  |  |  |  |  |  |  |  |  |  |  |  |  |  |  |  |  |  |  |  |  |  |  |  |  |  |  |  |  |  |  |  |  |  |  |  |  |  |  |  |  |  |  |  |  |  |  |  |  |  |  |  |  |  |  |  |  |  |  |  |  |  |  |  |  |  |  |  |  |  |  |  |  |  |  |  |  |  |  |  |  |  |  |  |  |  |  |  |  |  |  |  |

|                                                               | Lectin     |            |            |            |            |            |            |            |            |             | R3-loop   |             |       |     |     |     |     |     |     |     | Lectin |     |  |  |  |  |  |  |  |  |
|---------------------------------------------------------------|------------|------------|------------|------------|------------|------------|------------|------------|------------|-------------|-----------|-------------|-------|-----|-----|-----|-----|-----|-----|-----|--------|-----|--|--|--|--|--|--|--|--|
|                                                               | 130        | 140        | 150        | 160        | 170        | 180        | 190        | 200        | 210        | 220         | 230       | 130         | 140   | 150 | 160 | 170 | 180 | 190 | 200 | 210 | 220    | 230 |  |  |  |  |  |  |  |  |
| #U00735.2 Bovine_coronavirus_strain Mebus USA                 | IWMQNKGLFY | TQVYKNMNAV | RSLTFVNVPY | VYNGSAQSTA | LCKSGSLVLN | NPAYIAREAN | FGDYIYKVEA | DFYLSGCDEY | IVPLCIFNGK | F-----LSNFK | YYDSQVYFN | KDTGVYIIGLN | [240] |     |     |     |     |     |     |     |        |     |  |  |  |  |  |  |  |  |
| #NC_003045 Bovine_coronavirus_isolate BCoV-ENT USA            | .....      | .....      | .....      | .....      | .....      | .....      | .....      | .....      | .....      | .....       | .....     | .....       | [240] |     |     |     |     |     |     |     |        |     |  |  |  |  |  |  |  |  |
| #EF424615 Bovine_coronavirus_E-AH65 complete genome           | .....      | .....      | .....      | .....      | .....      | .....      | .....      | .....      | .....      | .....       | .....     | .....       | [240] |     |     |     |     |     |     |     |        |     |  |  |  |  |  |  |  |  |
| #AF220295 Bovine_coronavirus_strain Quebec Canada             | .....      | .....      | .....      | .....      | .....      | .....      | .....      | .....      | .....      | .....       | .....     | .....       | [240] |     |     |     |     |     |     |     |        |     |  |  |  |  |  |  |  |  |
| #EU019216 Bovine_coronavirus_Bubalus/Italy/179/07-11 Italy    | .....      | .....      | .....      | .....P.    | .....      | .....      | .....      | .....      | .....      | .....N      | .....     | .....       | [240] |     |     |     |     |     |     |     |        |     |  |  |  |  |  |  |  |  |
| #DQ994168.1:6-1275 Bovine_coronavirus_isolate KWD17 Korea     | .....      | .....      | .....      | .....      | .....      | .....      | .....      | .....      | .....      | .....       | .....     | .....       | [240] |     |     |     |     |     |     |     |        |     |  |  |  |  |  |  |  |  |
| #ON792942.1 Bovine_coronavirus_strain ABGEB0-54 2019 Ireland  | .....      | .....      | .....      | .....P.    | .....      | .....      | .....L     | .....      | .....      | .....       | .....S.   | .....       | [240] |     |     |     |     |     |     |     |        |     |  |  |  |  |  |  |  |  |
| #ON792962 Bovine_coronavirus_strain ABGEBB-129 Ireland        | .....      | .....      | .....      | .....P.    | .....      | .....      | .....L     | .....      | .....      | .....       | .....S.   | .....       | [240] |     |     |     |     |     |     |     |        |     |  |  |  |  |  |  |  |  |
| #FJ938065.1 Bovine_respiratory_coronavirus_AH187 USA 2000     | .....      | .....      | .....      | .....      | .....      | .....      | .....      | .....      | .....      | .....       | .....     | .....       | [240] |     |     |     |     |     |     |     |        |     |  |  |  |  |  |  |  |  |
| #MG757140 Bovine_coronavirus_isolate ICSA16-LBA 2014 France   | .....      | .....      | .....      | .....      | .....      | .....      | .....      | .....      | .....      | .....       | .....     | .....       | [240] |     |     |     |     |     |     |     |        |     |  |  |  |  |  |  |  |  |
| #MG757141 Bovine_coronavirus_isolate ICSA-pool-EN France      | .....      | .....      | .....      | .....      | .....      | .....      | .....      | .....      | .....      | .....       | .....     | .....       | [240] |     |     |     |     |     |     |     |        |     |  |  |  |  |  |  |  |  |
| #KX982264 Bovine_coronavirus_isolate BCoV_2014_13 France      | .....      | .....      | .....      | .....P.    | .....      | .....      | .....      | .....      | .....      | .....       | .....     | .....       | [240] |     |     |     |     |     |     |     |        |     |  |  |  |  |  |  |  |  |
| #Marmot/Italy/193728-35/2023/CoV                              | .....      | .....      | .....      | .....P.    | .....      | .....      | .....K     | .....      | .....      | .....       | .....     | .....       | [240] |     |     |     |     |     |     |     |        |     |  |  |  |  |  |  |  |  |
| #Marmot/Italy/193728-34/2023/CoV                              | .....      | .....      | .....      | .....P.    | .....      | .....      | .....K     | .....      | .....      | .....       | .....     | .....       | [240] |     |     |     |     |     |     |     |        |     |  |  |  |  |  |  |  |  |
| #OR367715 Bovine_coronavirus_isolate BCoV/XJ21/CHN/2023_China | .....      | .....      | .....      | .....      | .....      | .....      | .....      | .....      | .....      | .....       | .....     | .....       | [240] |     |     |     |     |     |     |     |        |     |  |  |  |  |  |  |  |  |
| #MN982199 Bovine_coronavirus_isolate BCoV-China/SWUN/A10/2018 | .....      | .....      | .....      | .....A.    | .....      | .....      | .....V     | .....A     | .....      | .....KATV   | .....     | .....       | [240] |     |     |     |     |     |     |     |        |     |  |  |  |  |  |  |  |  |

Table S3 - Molecular analysis of the amino acid sequences (aa) of the complete HE protein of Italian marmots and reference and field B-CoVs. The domains of the HE protein, the R3 and R4 loops and the receptor-binding domain (RBD) are highlighted in boxes [26]. Amino acid changes observed only in the marmot sequences are highlighted in yellow.
